# Supplementary material
Source: PubMed Central journal article supplement (PMC6739659)
Supplement: 853307_Appendix_1_online_supp.pdf [file 853307_Appendix_1_online_supp.pdf]

## Appendix 1:

### Selected risk markers for the development of heart failure<sup>2</sup>

| Demographic and lifestyle | Medical history         | Markers                               |
|---------------------------|-------------------------|---------------------------------------|
| Older age                 | Hypertension            | Abnormal ECG                          |
| Male sex                  | Coronary artery disease | Increased cardiothoracic ratio on CXR |
| Heavy alcohol use         | Diabetes                | Elevated neurohormonal biomarkers     |
| Smoking                   | Hyperlipidemia          | Elevated resting heart rate           |
| Physical inactivity       | Obesity                 | Microalbuminuria                      |

Beique LC, et al. 2017 Guidelines for the management of heart failure by pharmacists. *Can Pharm J* (Ott) 2019;152(5). DOI: 10.1177/1715163519853307.
