# Supplementary material
Source: PubMed Central journal article supplement (PMC6739659)
Supplement: 853307_Appendix_2_online_supp.pdf [file 853307_Appendix_2_online_supp.pdf]

## Appendix 2: Medications not recommended for HF and rationale

| Medication                                     | Rationale                                                                                                                                                                                                                                                                                                                                                                                                                                                                                                        |
|------------------------------------------------|------------------------------------------------------------------------------------------------------------------------------------------------------------------------------------------------------------------------------------------------------------------------------------------------------------------------------------------------------------------------------------------------------------------------------------------------------------------------------------------------------------------|
| Statins                                        | For those without a clear indication for statin (such as co-existent ischemic heart disease) there was no benefit solely for the indication of HF in clinical trials. Use statin treatment in accordance to the primary and secondary prevention guidelines for CVD (See CCS 2016 dyslipidemia guidelines).                                                                                                                                                                                                      |
| ASA or other antiplatelets                     | ASA for the primary prevention in HFrEF is not recommended<br>ASA is only recommended for those patients with clear indications for the secondary prevention of atherosclerotic cardiovascular events.                                                                                                                                                                                                                                                                                                           |
| Anticoagulation                                | Routine anticoagulation in patients with HFrEF, in sinus rhythm, and no other indications for anticoagulation is not recommended.<br>Do not routinely anticoagulate patients after a large anterior MI and a low EF without the presence of an intracardiac thrombus or another indication for anticoagulation.<br><b><i>Patients with an LV thrombus should be considered for anticoagulation. If anticoagulation is used, 3 months is a reasonable initial duration prior to reassessing for thrombus.</i></b> |
| Non-steroidal anti-inflammatory drugs (NSAIDs) | Recommend against the use of NSAIDs (including high dose ASA) and COX-2 inhibitors in patients who have HFrEF since it can cause fluid retention, worsen renal function, increase cardiovascular events and worsen HF.                                                                                                                                                                                                                                                                                           |
| Calcium channel blockers (CCBs)                | CCBs including diltiazem, verapamil, nifedipine and felodipine should be avoided in patients with HFrEF due to potential worsening of HF<br>Amlodipine can be used in HFrEF for other indications such as hypertension and angina symptoms.<br>Amlodipine can cause dose-related peripheral edema and should be taken into account when assessing edema potentially related to worsening HF.                                                                                                                     |
| Antiarrhythmics                                | Antiarrhythmics are only recommended if patients have symptomatic arrhythmias despite being on optimal medical therapy.<br>Only amiodarone has been proven to be acceptable in HFrEF patients.                                                                                                                                                                                                                                                                                                                   |

Beique LC, et al. 2017 Guidelines for the management of heart failure by pharmacists. *Can Pharm J* (Ott) 2019;152(5).  
DOI: 10.1177/1715163519853307.
