# Supplementary material
Source: PubMed Central journal article supplement (PMC6739659)
Supplement: 853307_Appendix_3_online_supp.pdf [file 853307_Appendix_3_online_supp.pdf]

## Appendix 3: HF medications and adjustments in renal dysfunction

| Medication/medication class         | Dose adjustment for renal dysfunction                                                                                                                              |
|-------------------------------------|--------------------------------------------------------------------------------------------------------------------------------------------------------------------|
| ACEi and ARBs                       | Used throughout all stages of CKD.                                                                                                                                 |
| Beta-blockers: Bisoprolol           | Starting dose remains the same for GFR<60 ml/min but closer monitoring HR and BP may be warranted if titrating up dose or if renal function significantly worsens. |
| MRAs: spironolactone and eplerenone | GFR 30-49 ml/min, consider lower dose of 25 mg daily.<br>Avoid if GFR<30 ml/min.                                                                                   |
| Sacubitril-valsartan                | Caution if eGFR <30 ml/min/m <sup>2</sup> , use lower initial dose                                                                                                 |
| Ivabradine                          | Not studied in CrCl <15 ml/min.                                                                                                                                    |
| Digoxin                             | Avoid if GFR <30 ml/min<br>If stable renal insufficiency with GFR> 30 ml/min, digoxin should be used judiciously at a low dose. Monitor renal function closely.    |
| Hydralazine                         | If GFR<10 ml/min, may need to increase interval (ex. TID changed to BID).                                                                                          |

Beique LC, et al. 2017 Guidelines for the management of heart failure by pharmacists. *Can Pharm J* (Ott) 2019;152(5).  
DOI: 10.1177/1715163519853307.
