# Supplementary material
Source: PubMed Central journal article supplement (PMC6739659)
Supplement: 853307_Appendix_4_online_supp.pdf [file 853307_Appendix_4_online_supp.pdf]

## Appendix 4: Nonpharmacological management of heart failure

| Non-pharmacological treatment or modification | Description                                                                                                                                                                                                       |
|-----------------------------------------------|-------------------------------------------------------------------------------------------------------------------------------------------------------------------------------------------------------------------|
| Exercise and rehabilitation                   | Regular exercise is recommended to improve exercise capacity, symptoms, and quality of life and to reduce hospital admissions. It should be individualized for each patient.                                      |
| Dietary salt intake                           | Most HF patients should restrict their dietary salt to 2-3 g/day but the optimal quantity should take into consideration other factors such as clinical situation, severity of symptoms and baseline consumption. |
| Daily fluid intake                            | For patients with fluid retention not easily controlled with diuretics, clear fluid overload, hyponatremia or demonstrated sensitivity to fluid intake, daily fluid intake should be restricted to 2 L/day.       |
| Alcohol intake                                | Alcohol intake should be avoided if it is a precipitating or contributing factor.                                                                                                                                 |
| Smoking cessation                             | Smoking cessation is encouraged in all HF patients.                                                                                                                                                               |
| Vaccines: Influenza and Pneumococcal          | HF patients are at higher risk of complications and contracting these illnesses can worsen HF. Vaccination is recommended.                                                                                        |

Beique LC, et al. 2017 Guidelines for the management of heart failure by pharmacists. *Can Pharm J* (Ott) 2019;152(5). DOI: 10.1177/1715163519853307.
