# Supplementary material
Source: PubMed Central journal article supplement (PMC6739659)
Supplement: 853307_Appendix_5_online_supp.pdf [file 853307_Appendix_5_online_supp.pdf]

## Appendix 5: Online tools and resources for HF

| Description                                                                                                                                                                     | Link                                                                                                                                                                                                                                                                                                                                                                                                                                                                                                                                                                                                                                                           |
|---------------------------------------------------------------------------------------------------------------------------------------------------------------------------------|----------------------------------------------------------------------------------------------------------------------------------------------------------------------------------------------------------------------------------------------------------------------------------------------------------------------------------------------------------------------------------------------------------------------------------------------------------------------------------------------------------------------------------------------------------------------------------------------------------------------------------------------------------------|
| Websites for patients                                                                                                                                                           | <a href="http://www.heartandstroke.ca/heart/conditions/heart-failure">www.heartandstroke.ca/heart/conditions/heart-failure</a><br><a href="http://www.bcheartfailure.ca">www.bcheartfailure.ca</a><br><a href="http://www.bcheartfailure.ca/for-patients-and-families/e-learning-module-on-hf">www.bcheartfailure.ca/for-patients-and-families/e-learning-module-on-hf</a><br><a href="http://www.heartfailurematters.org/en_GB">www.heartfailurematters.org/en_GB</a><br><a href="http://www.ottawaheart.ca/heart-failure-patient-guide">www.ottawaheart.ca/heart-failure-patient-guide</a><br><a href="http://www.hfsa.org/patient">www.hfsa.org/patient</a> |
| Phone apps for patients<br><i>These phone apps have medication trackers and reminders, symptom trackers and weight monitoring, tips and information on how to live with HF.</i> | HF Path by the American Heart Association<br>Heart Failure Storylines by the Heart Failure Society of America                                                                                                                                                                                                                                                                                                                                                                                                                                                                                                                                                  |
| Handouts for patients<br><i>Some handouts are provided in different languages and there are handouts for health eating tips and recipes for different cuisines.</i>             | <a href="http://www.heartandstroke.ca/what-we-do/publications">http://www.heartandstroke.ca/what-we-do/publications</a><br><a href="http://www.bcheartfailure.ca/for-patients-and-families/co-management-resources/">http://www.bcheartfailure.ca/for-patients-and-families/co-management-resources/</a>                                                                                                                                                                                                                                                                                                                                                       |
| Websites for pharmacists and other health care professionals                                                                                                                    | <a href="https://www.ccs.ca/en/heart-failure-program">https://www.ccs.ca/en/heart-failure-program</a><br><a href="https://www.ccs.ca/en/guidelines/guideline-resources">https://www.ccs.ca/en/guidelines/guideline-resources</a>                                                                                                                                                                                                                                                                                                                                                                                                                               |
| Phone apps for pharmacists                                                                                                                                                      | CCS app<br>MED-HF app or website<br>TOM-C HF tool <sup>1</sup>                                                                                                                                                                                                                                                                                                                                                                                                                                                                                                                                                                                                 |

Beique LC, et al. 2017 Guidelines for the management of heart failure by pharmacists. *Can Pharm J* (Ott) 2019;152(5). DOI: 10.1177/1715163519853307.
